# Supplementary material for: Of eyes and embryos: subfunctionalization of the CRX homeobox gene in mammalian evolution
Source: PubMed Central journal article supplement (PMC6661347; doi:10.1098/rspb.2019.0830), 2019-07-24

Electronic Supplementary Information 2

Royall AH, Frankenberg S, Pask AJ, Holland PWHH.

**Of eyes and embryos: subfunctionalisation of the CRX homeobox gene in mammalian evolution.**

Proceedings of the Royal Society B.

DOI 10.1098/rspb.2019.0830

(A) SRA identifiers for mouse preimplantation transcriptome datasets.

(B) Maximum-likelihood tree of CRX protein sequences from across metazoans shows divergence of sequence in eutherian mammals.

(C) Homeodomains of mouse ETCHbox genes do not show compensatory changes for the amino acids substituted in eutherian CRX homeodomain.

(D) RT-PCR for *CRX* expression in fat-tailed dunnart adult tissues.

(E) Immunocytochemistry staining for V5-tagged CRX proteins in MEFs shows nuclear localisation and demonstrates correct translation frame.

(F) TPM for ectopically expressed genes and chemical selection gene (puromycinR) shows there is no discrepancy in the levels of ectopic expression between samples, and that there is no endogenous expression of mouse *Crx* in the MEFs used.

(G) Mouse preimplantation embryo transcriptome profiles generated using MFuzz.

# A

SRA identifiers for mouse preimplantation transcriptome datasets.

---

| Species | Tissue     | SRA study | Run ID     |
|---------|------------|-----------|------------|
| Mmus    | Oocyte     | SRP03454  | SRR1051273 |
| Mmus    | Oocyte     | SRP03454  | SRR1051274 |
| Mmus    | Oocyte     | SRP03454  | SRR1051275 |
| Mmus    | Oocyte     | SRP03454  | SRR1051276 |
| Mmus    | Oocyte     | SRP03454  | SRR1051277 |
| Mmus    | Zygote     | SRP03454  | SRR1567937 |
| Mmus    | Zygote     | SRP03454  | SRR1051279 |
| Mmus    | Zygote     | SRP03454  | SRR1051278 |
| Mmus    | 2Cell      | SRP03454  | SRR1051282 |
| Mmus    | 2Cell      | SRP03454  | SRR1051281 |
| Mmus    | 2Cell      | SRP03454  | SRR1051280 |
| Mmus    | 4Cell      | SRP03454  | SRR1567921 |
| Mmus    | 4Cell      | SRP03454  | SRR1567920 |
| Mmus    | 4Cell      | SRP03454  | SRR1567919 |
| Mmus    | 8Cell      | SRP03454  | SRR1567924 |
| Mmus    | 8Cell      | SRP03454  | SRR1567923 |
| Mmus    | 8Cell      | SRP03454  | SRR1567922 |
| Mmus    | Morula     | SRP03454  | SRR2048257 |
| Mmus    | Morula     | SRP03454  | SRR2048256 |
| Mmus    | Morula     | SRP03454  | SRR2048255 |
| Mmus    | Blastocyst | SRP03454  | SRR1567925 |
| Mmus    | Blastocyst | SRP03454  | SRR1567926 |
| Mmus    | Blastocyst | SRP03454  | SRR1567927 |
| Mmus    | Blastocyst | SRP03454  | SRR1567928 |
| Mmus    | E7.5       | SRP03776  | SRR1168503 |

# B

Maximum-likelihood tree of CRX protein sequences from across metazoans shows divergence of sequence in eutherian mammals.

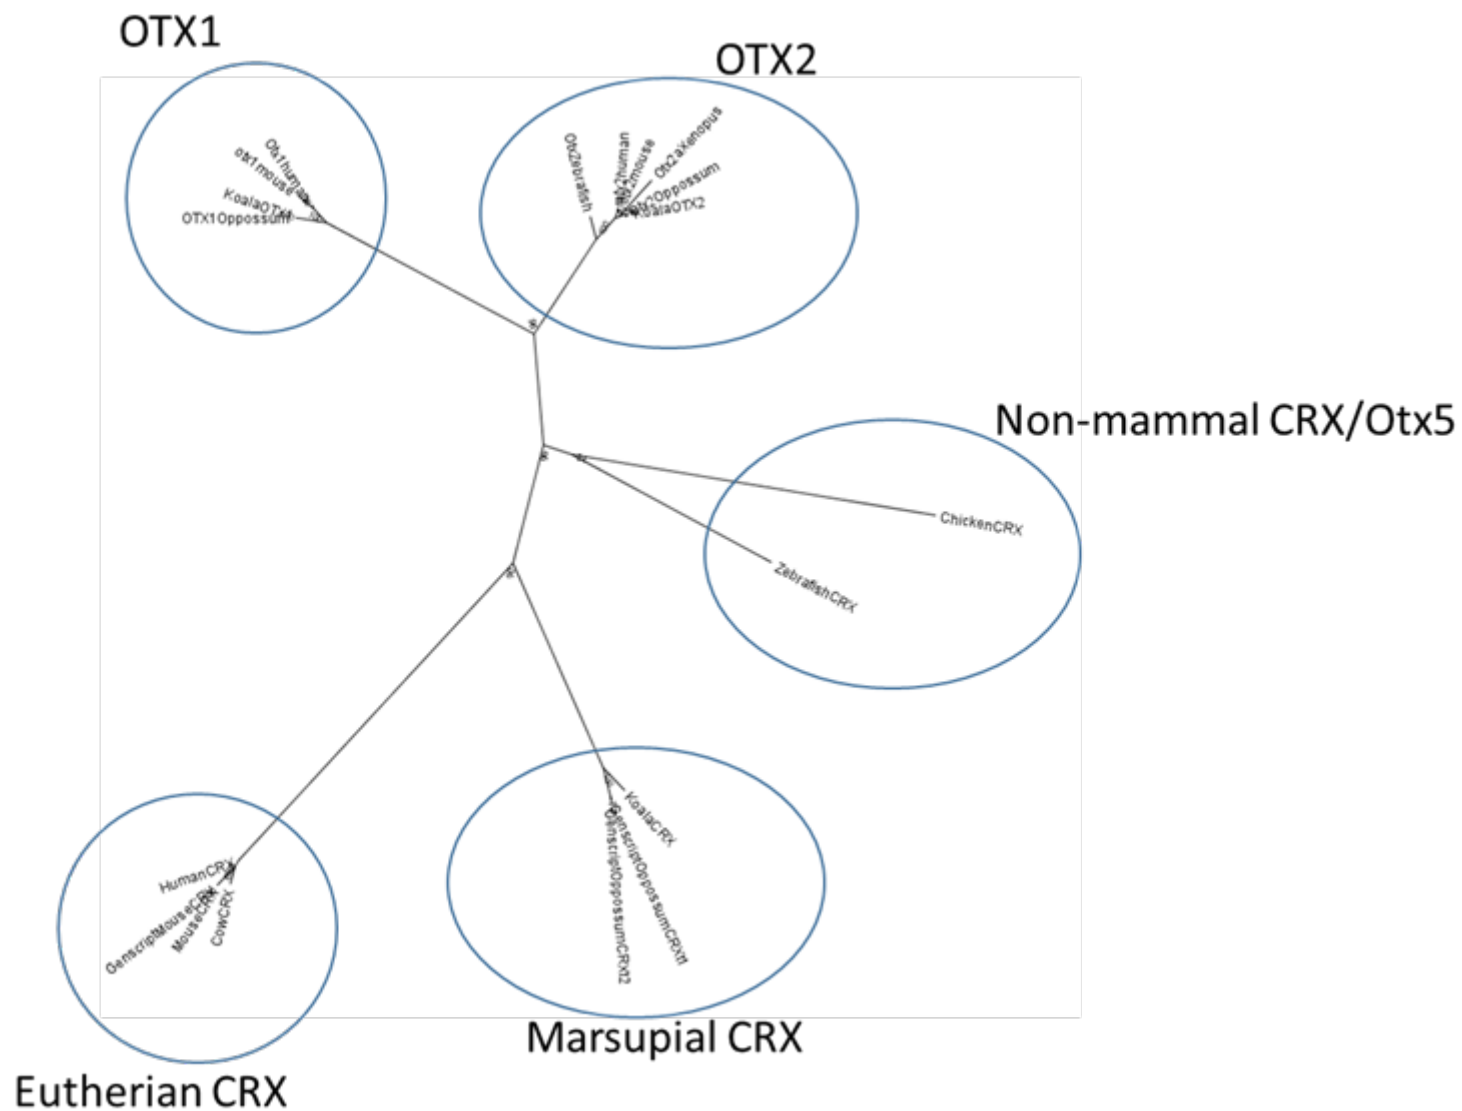

C

Homeodomains of mouse ETCHbox genes do not show compensatory changes for the amino acids which are lost in eutherian *CRX* homeodomain (black boxes). H = Human *CRX*, O = Opossum *CRX*.

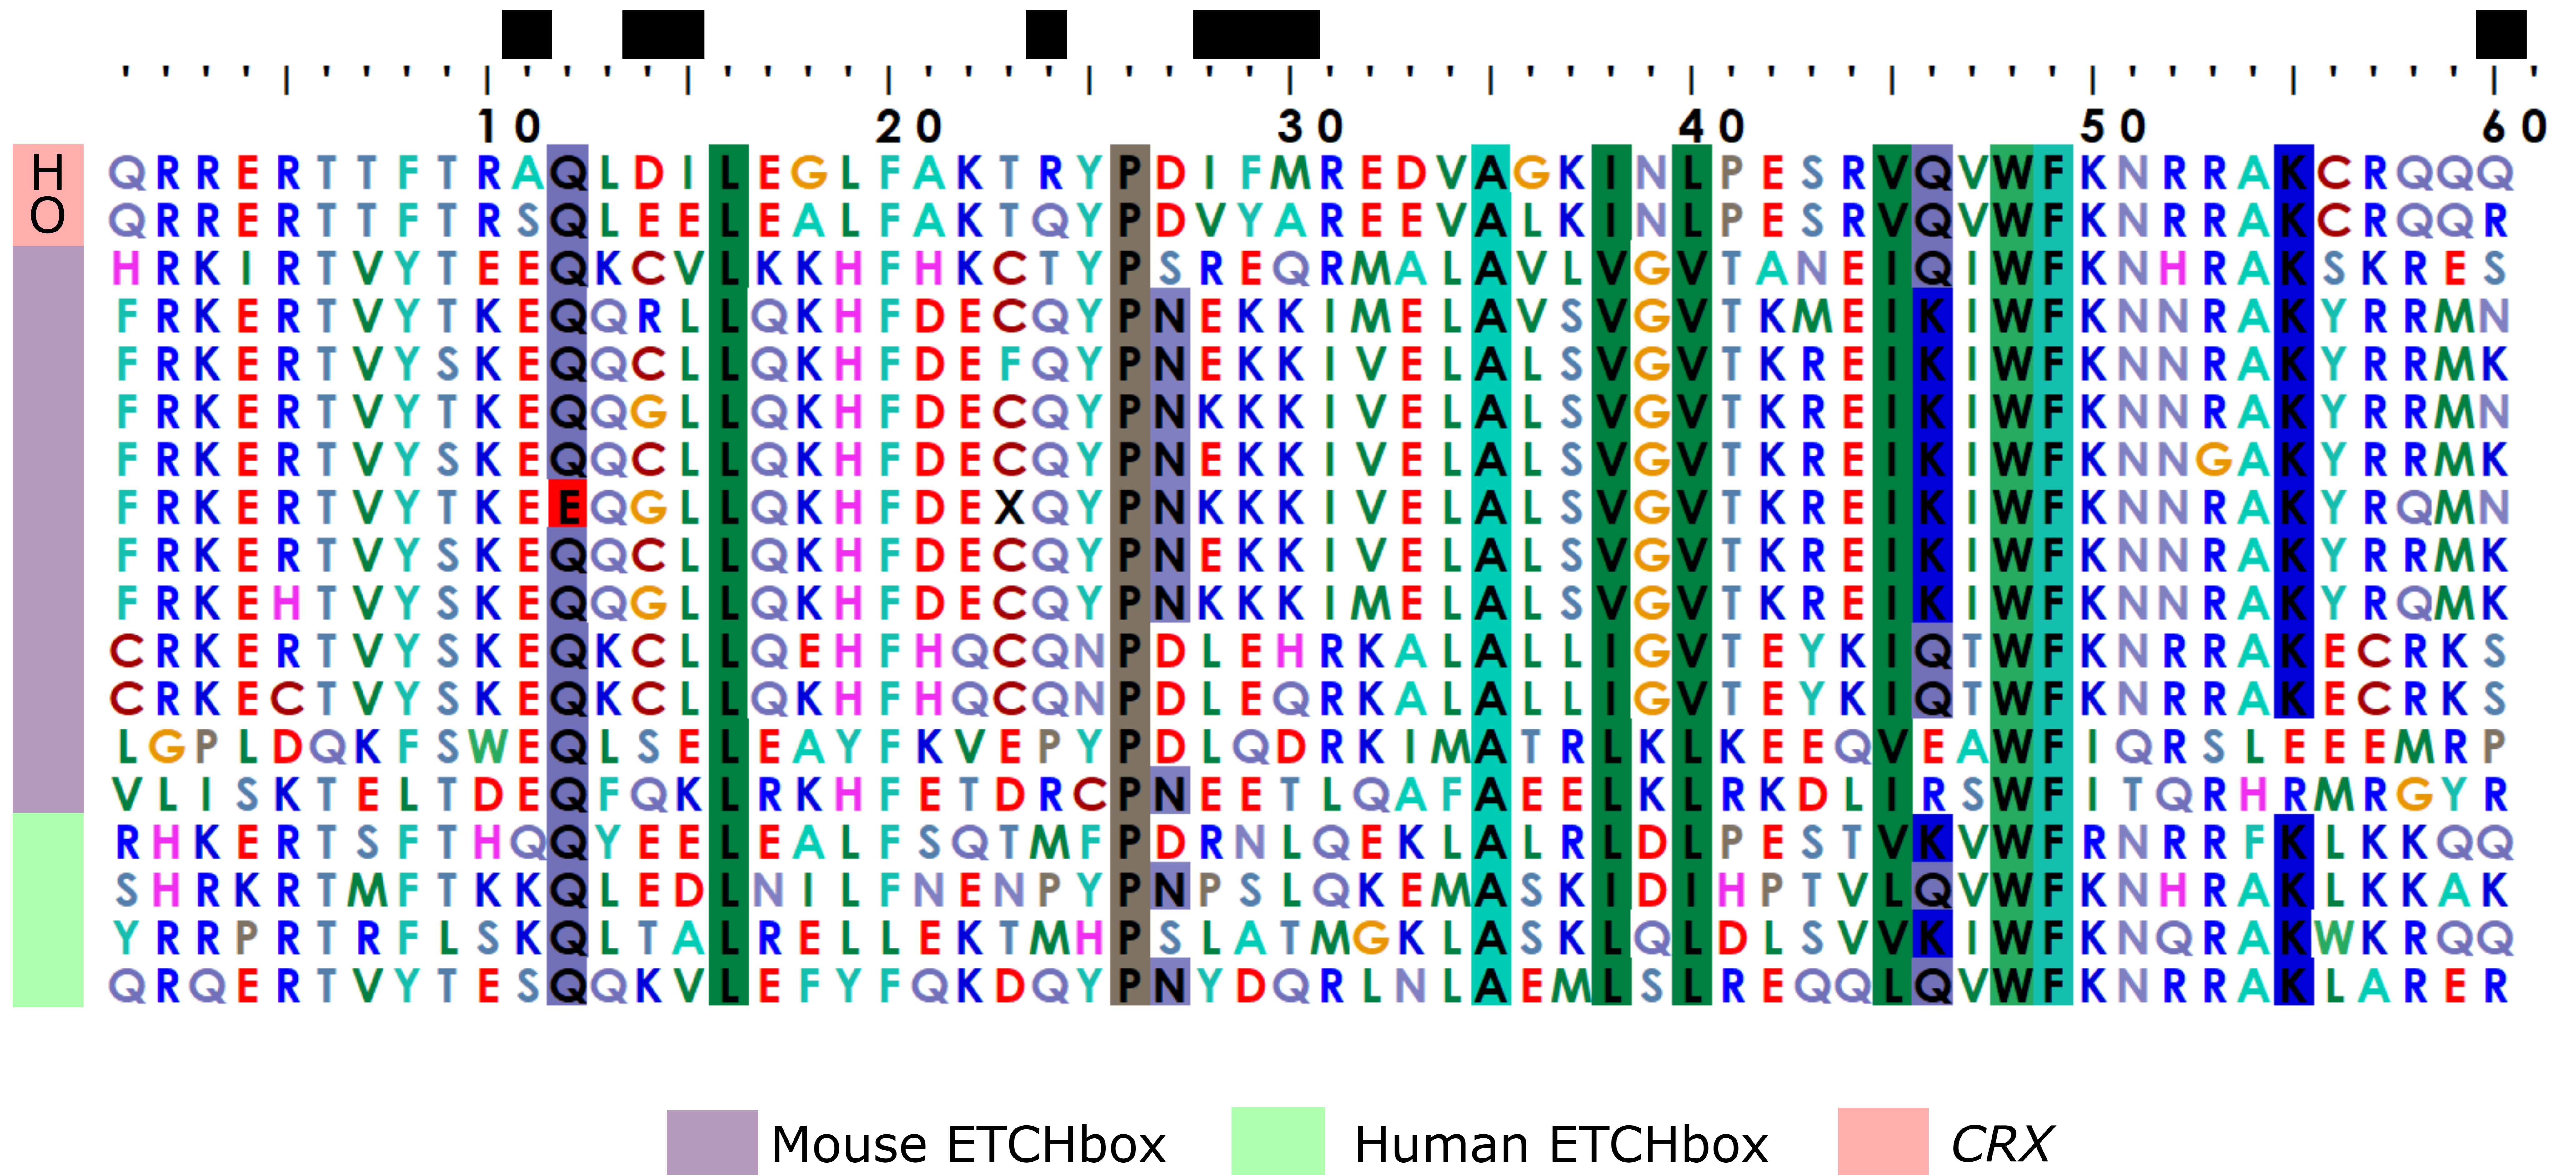

# D

Reverse-Transcriptase PCR for *CRX* expression in fat-tailed dunnart adult tissues.

---

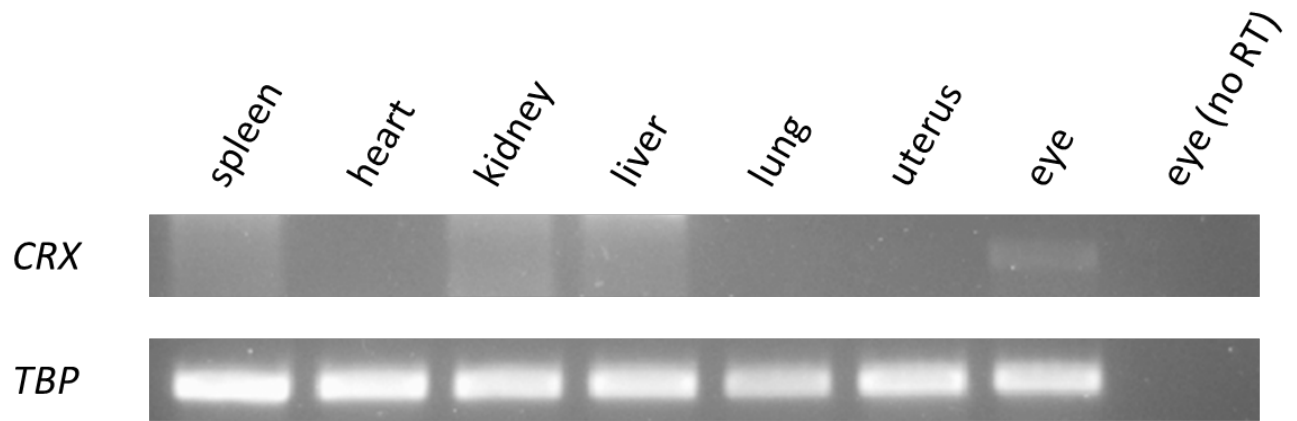

# E

## Metatherian and eutherian CRXectopic expression in MEFs is localised to the nucleus

The Opossum (*Monodelphis domestica*) is often used as a tool for investigating the evolution of mammals as it is thought to possess ancestral characteristics of the early metatherians. In order to study the role of *Crx* in regulating the transcriptome, and whether there is any distinction between the effect of metatherian and eutherian *Crx*, we ectopically expressed either *Monodelphis domestica* or human *Crx* genes in primary mouse cells and carried out Poly-A RNA-sequencing.

As homeodomain proteins such as *Crx* function as transcription factors, it is important to confirm that the ectopically expressed protein localises to the nucleus. To test this we ectopically expressed a both proteins of interest with a V5 tag in primary MEFs and visualised the cellular localisation of the fusion protein through immunostaining against the tag. It is particularly important in this case to confirm the sub-cellular protein localisation following over-expression as we are studying genes in the cells of a foreign species meaning it cannot necessarily be assumed that modifications and mechanisms that confer nuclear localisation are transferable between species. The evident nuclear localisation of both proteins in a heterologous system implies that the assumed *in vivo* function may be recapitulated in our experimental system.

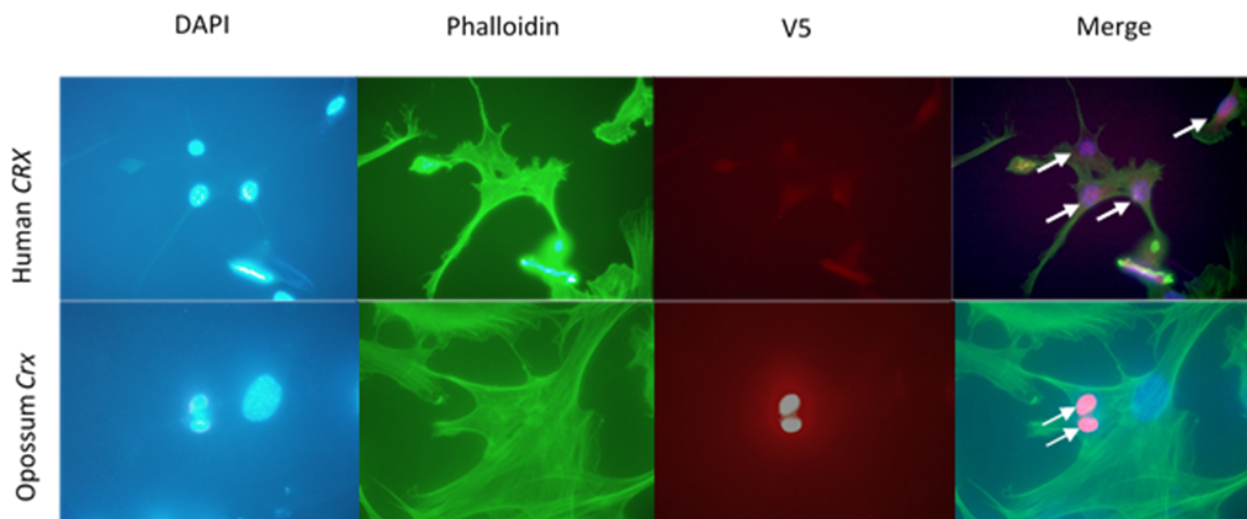

# F

TPM for ectopically expressed genes and chemical selection gene (puromycinR) shows there is no discrepancy in the levels of ectopic expression between samples, and that there is no endogenous expression of mouse *Crx* in the MEFs used.

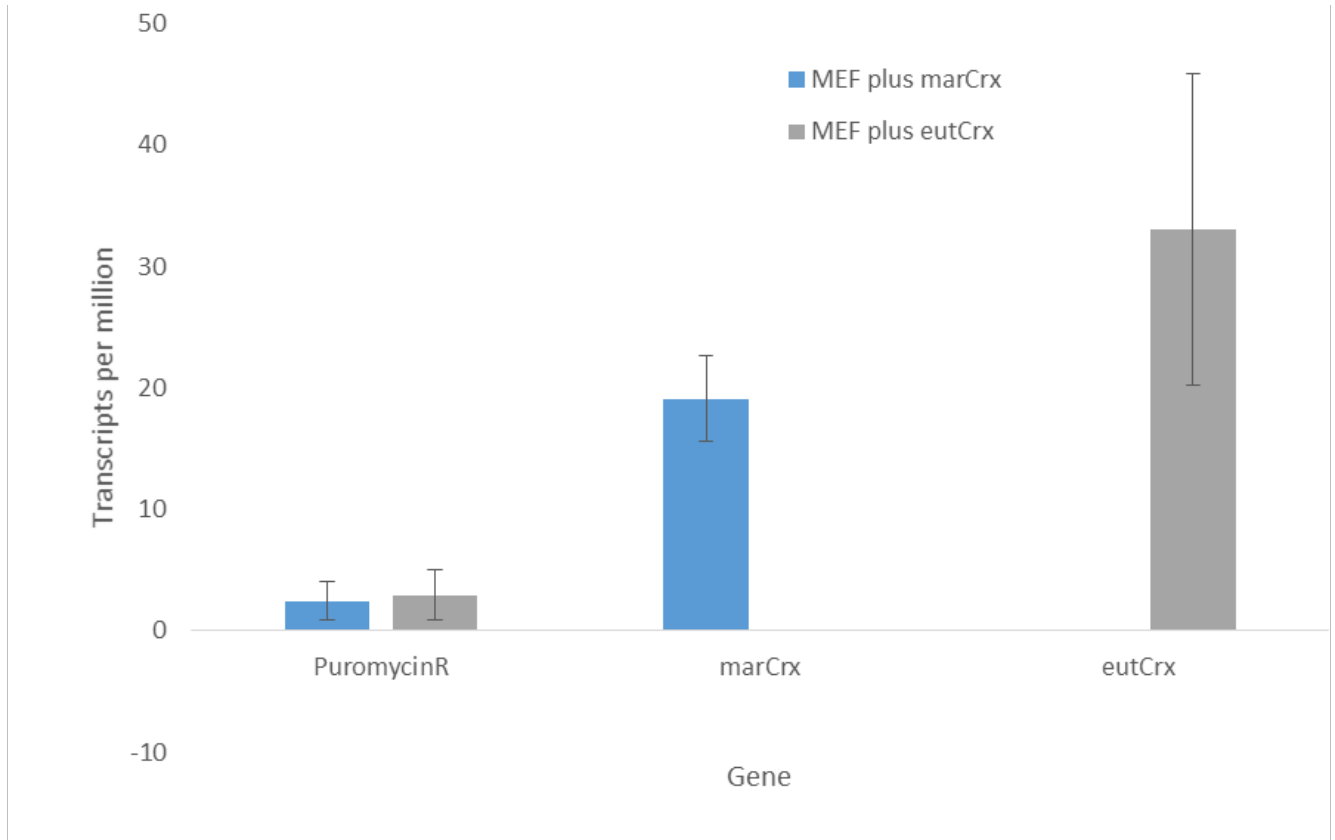

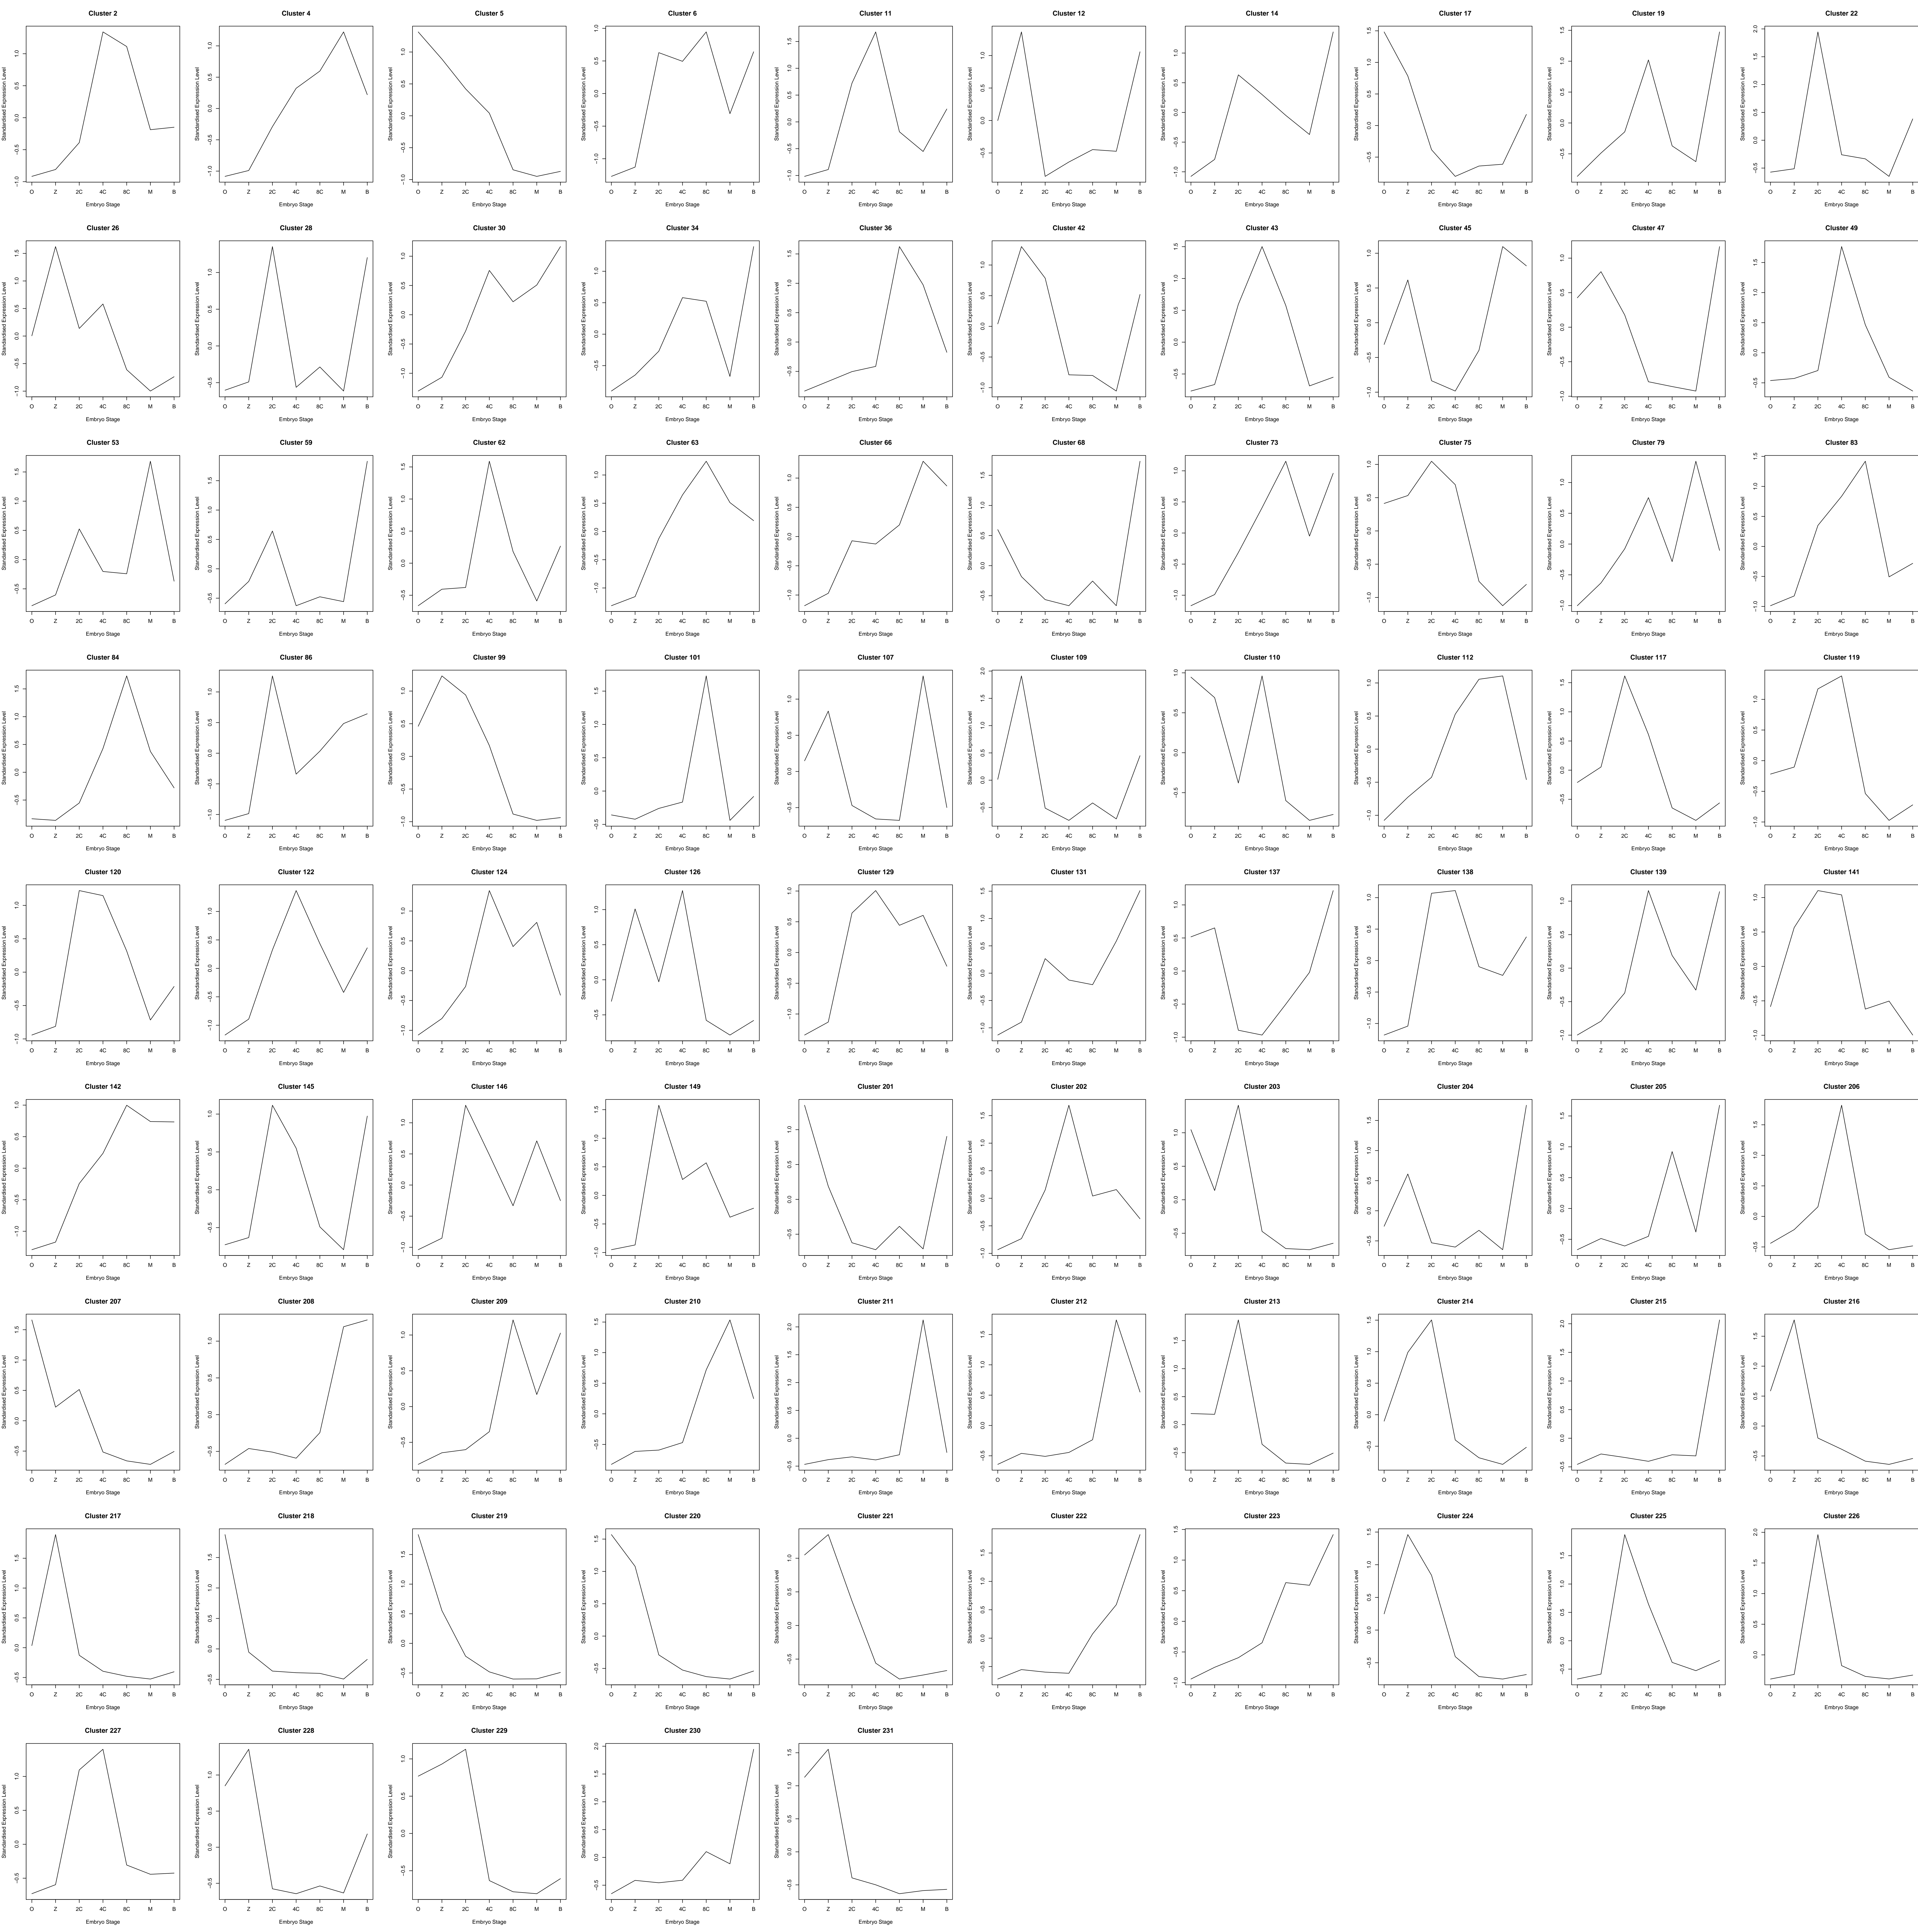

Supplement: rspb20190830supp2.pdf [file rspb20190830supp2.pdf]
